# Supplementary material for: Ixeris dentata Extract Increases Salivary Secretion through the Regulation of Endoplasmic Reticulum Stress in a Diabetes-Induced Xerostomia Rat Model
Source: MDPI journal article supplement (doi:10.3390/ijms19041059), 2018-04-02
Supplement: s1 [file s1]

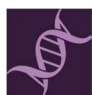

## Supplementary Materials

A

| HPLC conditions      |                                          |                  |              |
|----------------------|------------------------------------------|------------------|--------------|
| Instrument Parameter | Agilent 1260 UPLC system                 |                  |              |
| Column               | YMC Hydrosphere C18 (4.6 × 250 mm, 5 μm) |                  |              |
| Mobile Phase         | Time                                     | 0.1% acetic acid | Acetonitrile |
|                      | 0.0                                      | 93.0             | 7.0          |
|                      | 13.0                                     | 89.0             | 11.0         |
|                      | 30.0                                     | 82.0             | 18.0         |
|                      | 45.0                                     | 72.0             | 28.0         |
|                      | 55.0                                     | 72.0             | 28.0         |
| Flow rate            | 1.0 mL/min                               |                  |              |
| Injection volume     | 10 μL                                    |                  |              |
| Detection            | UV 254 nm                                |                  |              |

B

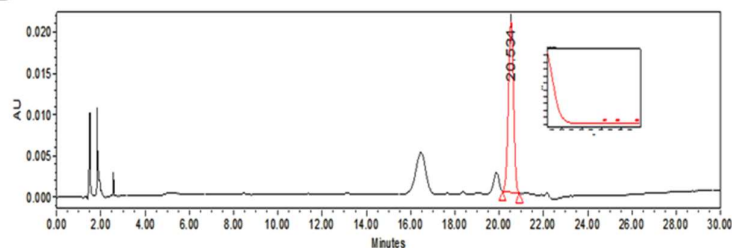

Fig. Ixerin M chromatogram

C

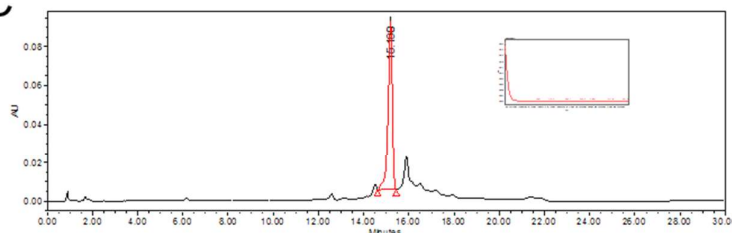

Fig. Ixerin F chromatogram

D

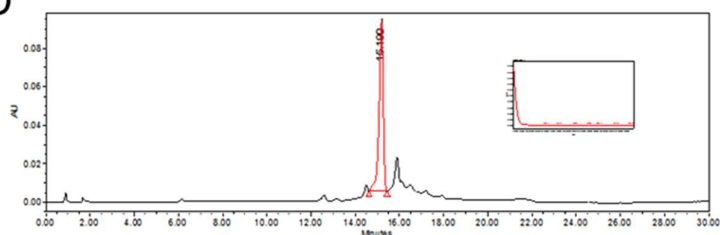

Fig. 8-epiisolipidiol-3-β-D-glucopyranoside (8-EI-3-G) chromatogram

**Figure S1.** HPLC conditions and the chromatogram. (A) HPLC conditions used in quantitation of pure compounds from the IXD extract; (B) Chromatogram of Ixerin M; (C) Chromatogram of Ixerin F; (D) Chromatogram of epiisolipidiol-3-β-D-glucopyranoside.

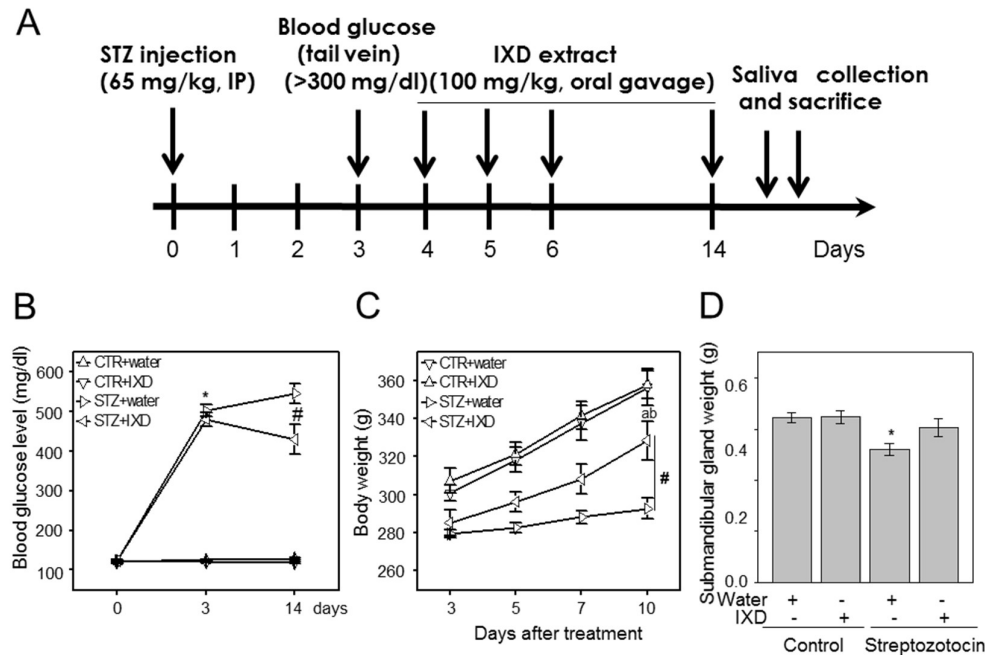

**Figure S2.** Experiment scheme, blood glucose and body weight measurement. (A) Schematic diagram of the experimental design (*in vivo*); (B) Blood glucose measurement in control and STZ-induced diabetic rats with or without IXD treatment. Diabetes was induced by a single dose of STZ injection. Blood glucose level was determined after 3 days of diabetic induction. Vehicle (water) or the IXD extract was added orally for 10 days, and blood glucose level was measured before saliva collection. \* indicates significant differences in STZ-induced diabetic rats compared to vehicle-treated control rats and # indicates significant differences in IXD treated diabetic rats compared to vehicle-treated diabetic rats. Values are represented as mean  $\pm$  S.E. ( $p < 0.05$ ); (C) Body weight was measured after 3 days of vehicle or STZ injection along with water or IXD extract treatment for 10 days. "a" indicates significant differences in body weight of 10 day- to 3 day-IXD-treated diabetic rats, "b" indicates significant differences in body weight of 10 day- to 5 day-IXD-treated diabetic rats and # indicates the significant differences in body weight of 10 day-IXD-treated diabetic rats to 10 day-vehicle-treated diabetic rats; (D) Total submandibular gland weight (g), \* $p < 0.05$ .

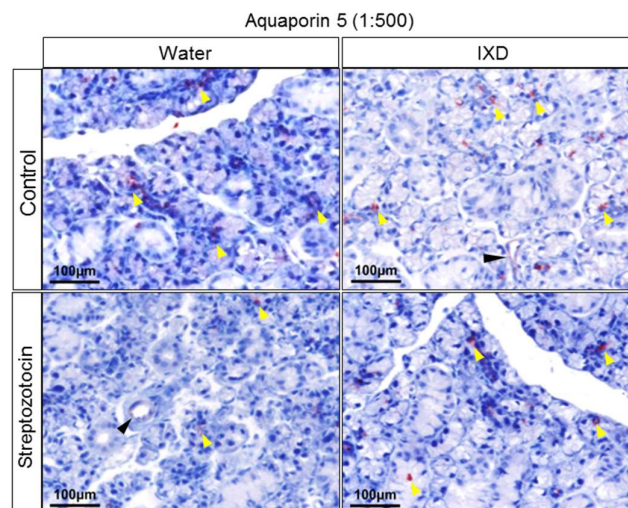

**Figure S3.** Immunohistochemical detection showing AQP5 protein expression in rat submandibular gland tissue. Immunostaining was performed using anti-rabbit AQP5 antibody at a dilution of 1:500.

Yellow arrow heads pointing to brownish red colour indicate AQP5 positive acinar cells and black arrow heads indicates AQP5 expression in duct cells. Magnification: 40×; Scale bar: 100  $\mu\text{m}$ .

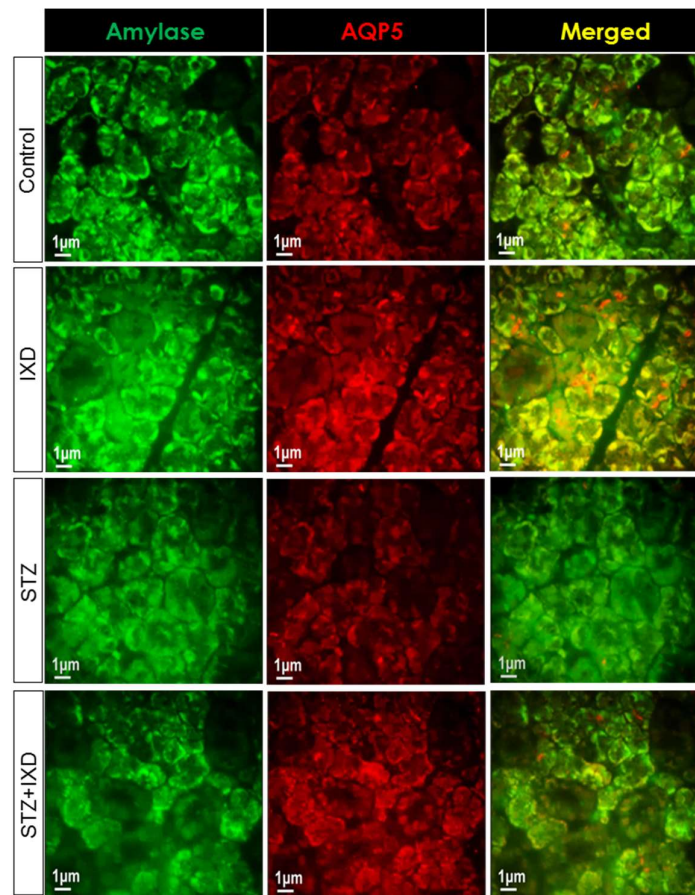

**Figure S4.** Subcellular localization of  $\alpha$ -amylase and AQP5 in the submandibular gland. Double labelled immunofluorescence, performed using amylase and AQP5 antibody, was observed by confocal microscopy. Vehicle or STZ-induced diabetic rats were treated with either water or the IXD extract to observe the expression and localization of amylase and AQP5 in the submandibular gland. Green colour fluorescence indicates  $\alpha$ -amylase expression, red colour fluorescence indicates AQP5 expression, and yellow colour fluorescence indicates co-localization of both proteins. IXD extract treatment showed high intensity of amylase and AQP5 fluorescence when compared with their control counterparts. Magnification: 40×; Scale bar: 1  $\mu\text{m}$ .

**Table S1.** Mass of IXD roots (grams) and extracts obtained, calculated in grams and percentage.

|                           | 20% EtOH | 40% EtOH | 60% EtOH | 80% EtOH | 100% EtOH |
|---------------------------|----------|----------|----------|----------|-----------|
| Total IXD root weight (g) | 1150     | 1200     | 1200     | 1200     | 1200      |
| IXD extract (g)           | 36.23    | 27.44    | 29.75    | 22.92    | 30.54     |
| Extract (%)               | 3.15     | 2.29     | 2.48     | 1.91     | 2.55      |
